# Supplementary material
Source: Springer Nature journal article supplement (https://www.springermedizin.de/resource/supplementary/12889_2012_4857_MOESM1_ESM.pdf/9490650)

**Figure 1. Study sites**

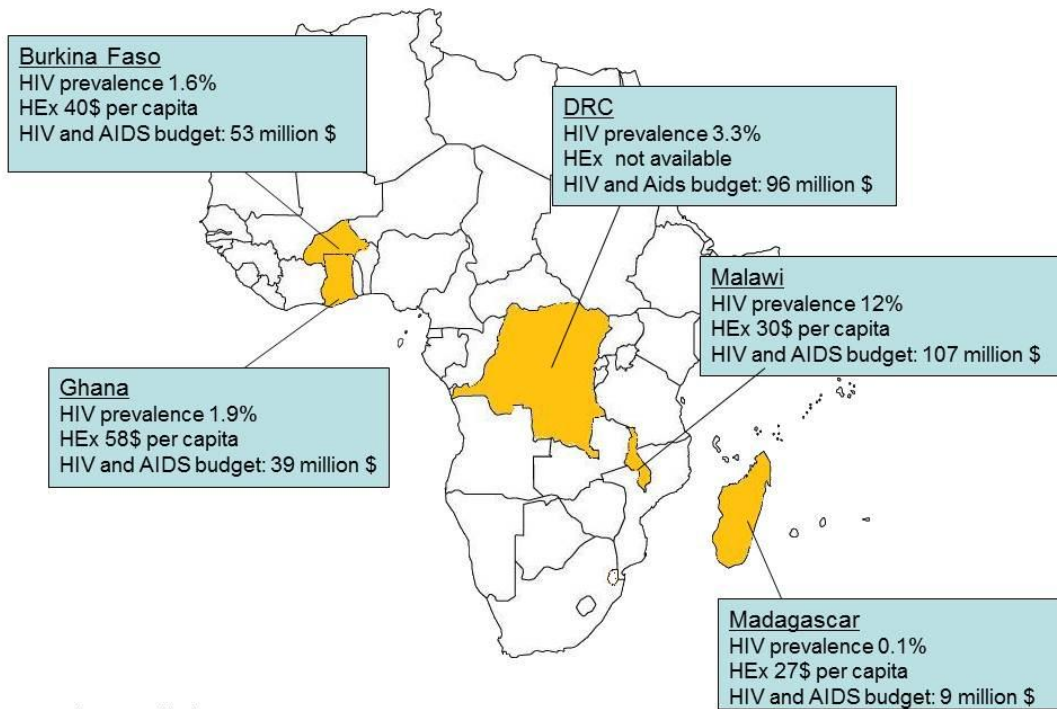

Supplement: MOESM1 [file 9490650]
